# Supplementary material for: Functions of serine from the phosphorylated pathway on growth, male gametogenesis, and metabolism in Marchantia polymorpha
Source: Research Square preprint supplement (doi:10.21203/rs.3.rs-2663856/v1), 2023-04-10
Supplement: Supplementary file 1 [file 05ff6d0a9314ce0270a36ec5.pdf]

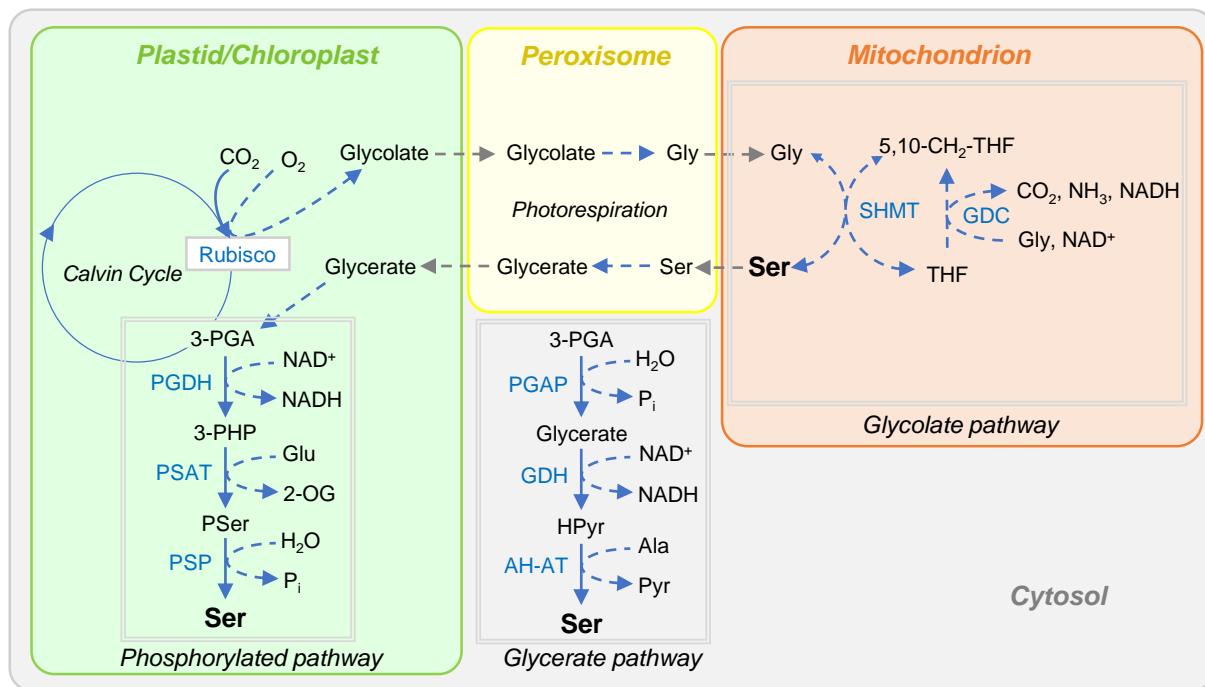

### Supplementary Fig. S1: Serine biosynthesis pathways in plants.

In plants, serine can be synthesized via three pathways: phosphorylated, glycerate, and glycolate pathways. PGDH, 3-phosphoglycerate dehydrogenase; PSAT, 3-phosphoserine aminotransferase; PSP, 3-phosphoserine phosphatase; PGAP, 3-phosphoglycerate phosphatase; GDH, glycerate dehydrogenase; AH-AT, alanine-hydroxypyruvate aminotransferase; GGAT, glyoxylate glutamate aminotransferase; GDC, glycine decarboxylase complex; SHMT, serine hydroxymethyl transferase; 3-PGA, 3-phosphoglycerate; 3-PHP, 3-phosphohydroxypyruvate; Pser, 3-phosphoserine; Ser, serine; Hpyr, hydroxypyruvate; Ala, alanine; Pyr, pyruvate; Glu, glutamate; Gly, glycine; 2-OG, 2-oxoglutarate; THF, tetrahydrofolate; 5,10-CH<sub>2</sub>-THF, 5,10-methylenetetrahydrofolate.

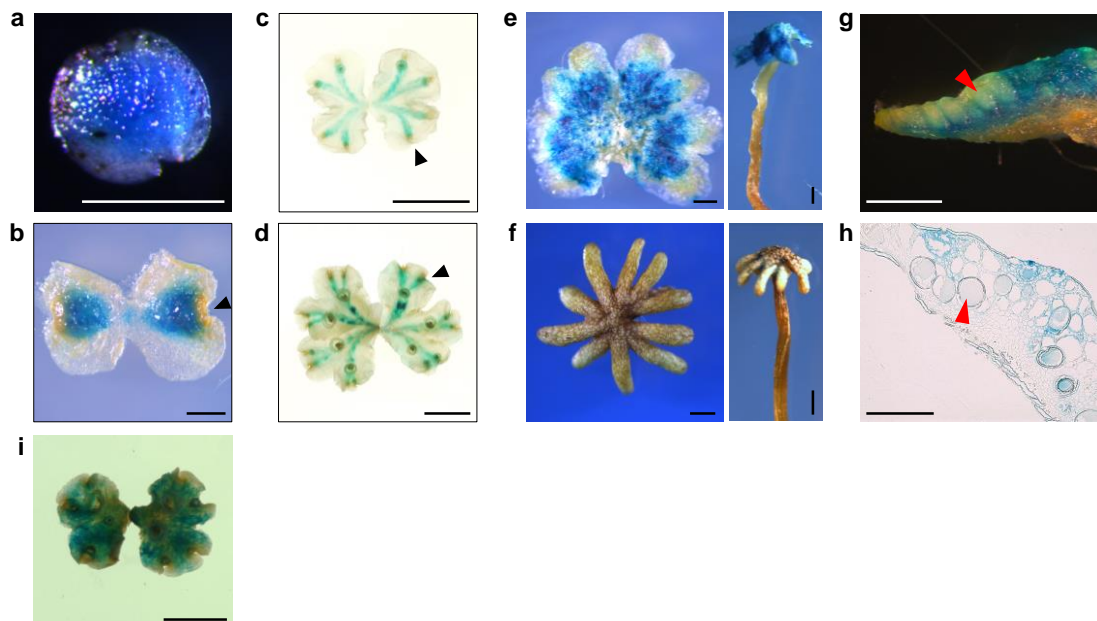

**Supplementary Fig. S2: *MpPGDH* expression pattern.**

**(a)-(h)** GUS staining in the gemma (a), 1-week-old thallus (b), 2-week-old thallus (c), 4-week-old thallus (d), antheridiophore (e), archegoniophore (f), and cross-section of an antheridial receptacle (g, h) of transgenic plants expressing the GUS reporter gene under the control of *MpPGDH* promoter grown under L/D conditions in ambient CO<sub>2</sub> (sampled during light exposure). Black arrowheads in (b), (c), and (d) indicate apical notches. Red arrowheads in (g) and (h) indicate the antheridium. **(i)** GUS staining in 2-week-old thallus grown under L/D condition in high CO<sub>2</sub>. Scale bars = 1 mm (a, b, e, f, g, h) and 1 cm (c, d, i).

**a**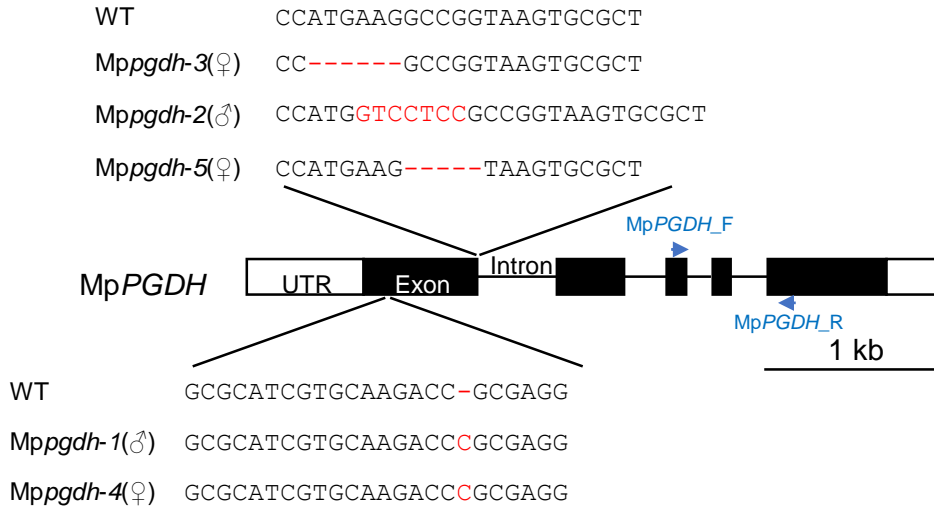**b**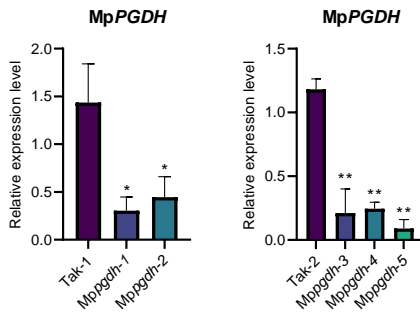**c**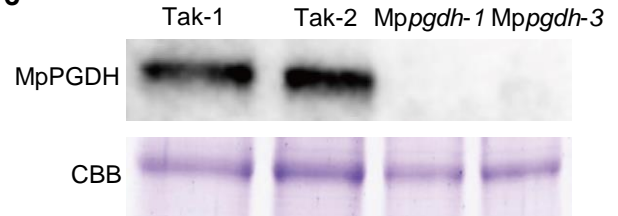

### Supplementary Fig. S3: Construction of *MpPGDH* knockout lines.

(a) *MpPGDH* is a 3902-bp single gene. *MpPGDH* knockout mutants were constructed using CRISPR/Cas9 system. Two male and three female mutants were selected for the analysis. *Mppgdh-1* and *Mppgdh-4* had a 1-bp insertion in the first exon. *Mppgdh-2* has a 7-bp insertion, whereas *Mppgdh-3* and *Mppgdh-5* had 6-bp and 5-bp deletion, respectively, at the border between the first exon and the first intron. The blue arrows show the primers used to check *MpPGDH* transcript levels in the mutants. (b) *MpPGDH* transcript level in selected mutants. Tak-1 and Tak-2 are male and female wild-type lines, respectively. *MpACT1* was used as an internal control. Data are presented as the means  $\pm$  SD of three biological replicates ( $n = 3$ ). Asterisks indicate statistically significant differences (Student's *t*-test, \* $p < 0.05$ , \*\* $p < 0.01$ ). (c) Western blot analysis of *MpPGDH* protein in wild types and mutants. Coomassie brilliant blue (CBB) staining revealed the total loading quantity of the protein samples.

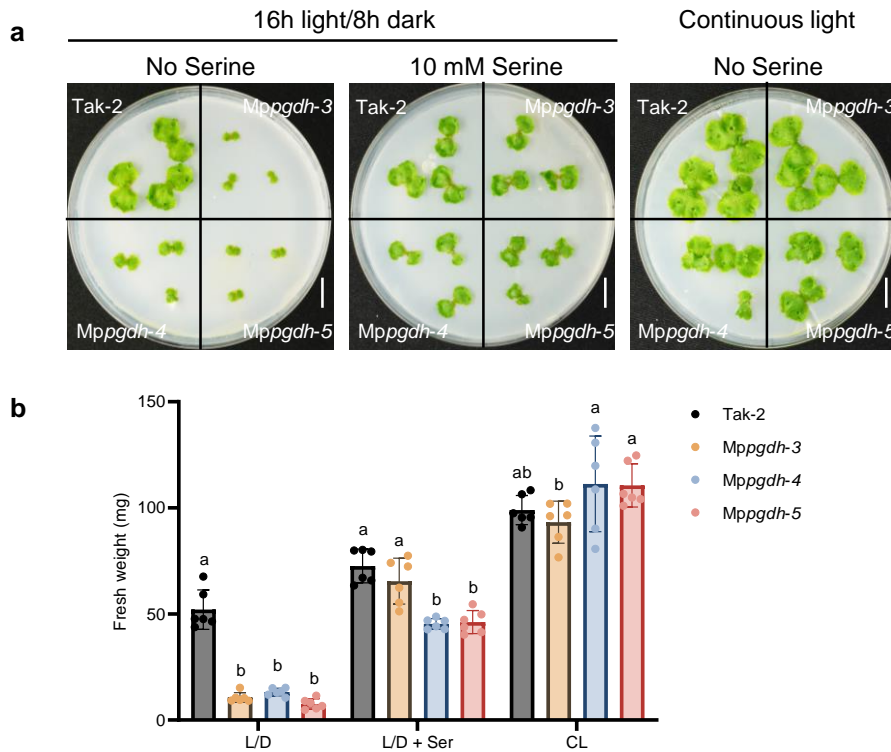

**Supplementary Fig. S4: Thallus growth in the female *Mppgdh* mutants.**

**(a)** Plants grown on  $\frac{1}{2}$  B5 agar medium for 14 days with or without serine supplementation under 16h light/8h dark (L/D) or continuous light (CL) conditions. Scale bars = 1 cm. **(b)** The fresh weights of *Mppgdh-3*, *Mppgdh-4*, *Mppgdh-5*, and wild-type Tak-2. Data represent means  $\pm$  SD of six biological replicates ( $n = 6$ ). One-way ANOVA followed by Tukey's test ( $p < 0.05$ ) was performed in each group; columns with the same letter are not significantly different.

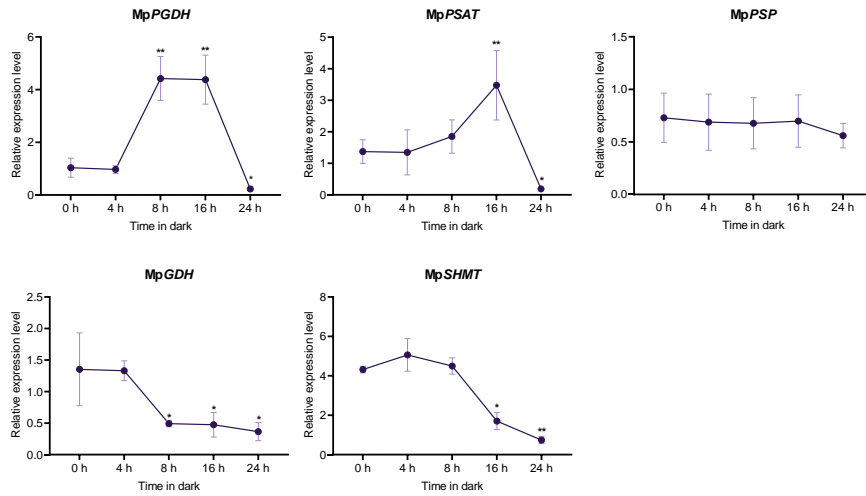

### Supplementary Fig. S5: Expression of serine biosynthesis pathway genes in the dark.

The 14-day-old Tak-1 thalli grown under the CL condition were transferred to the dark. Total RNA was extracted from Tak-1 at 0, 4, 8, 16, and 24 h after transfer. Two thalli were used as one sample. The expressions of *MpPGDH*, *MpPSAT*, *MpPSP*, *MpGDH*, and *MpSHMT* were determined by qRT-PCR. The gene expression was normalized against that of *MpACT1*. Asterisks indicate statistically significant differences of compared with expression level at 0 h (n = 3, Student's *t*-test, \**p* < 0.05, \*\**p* < 0.01).

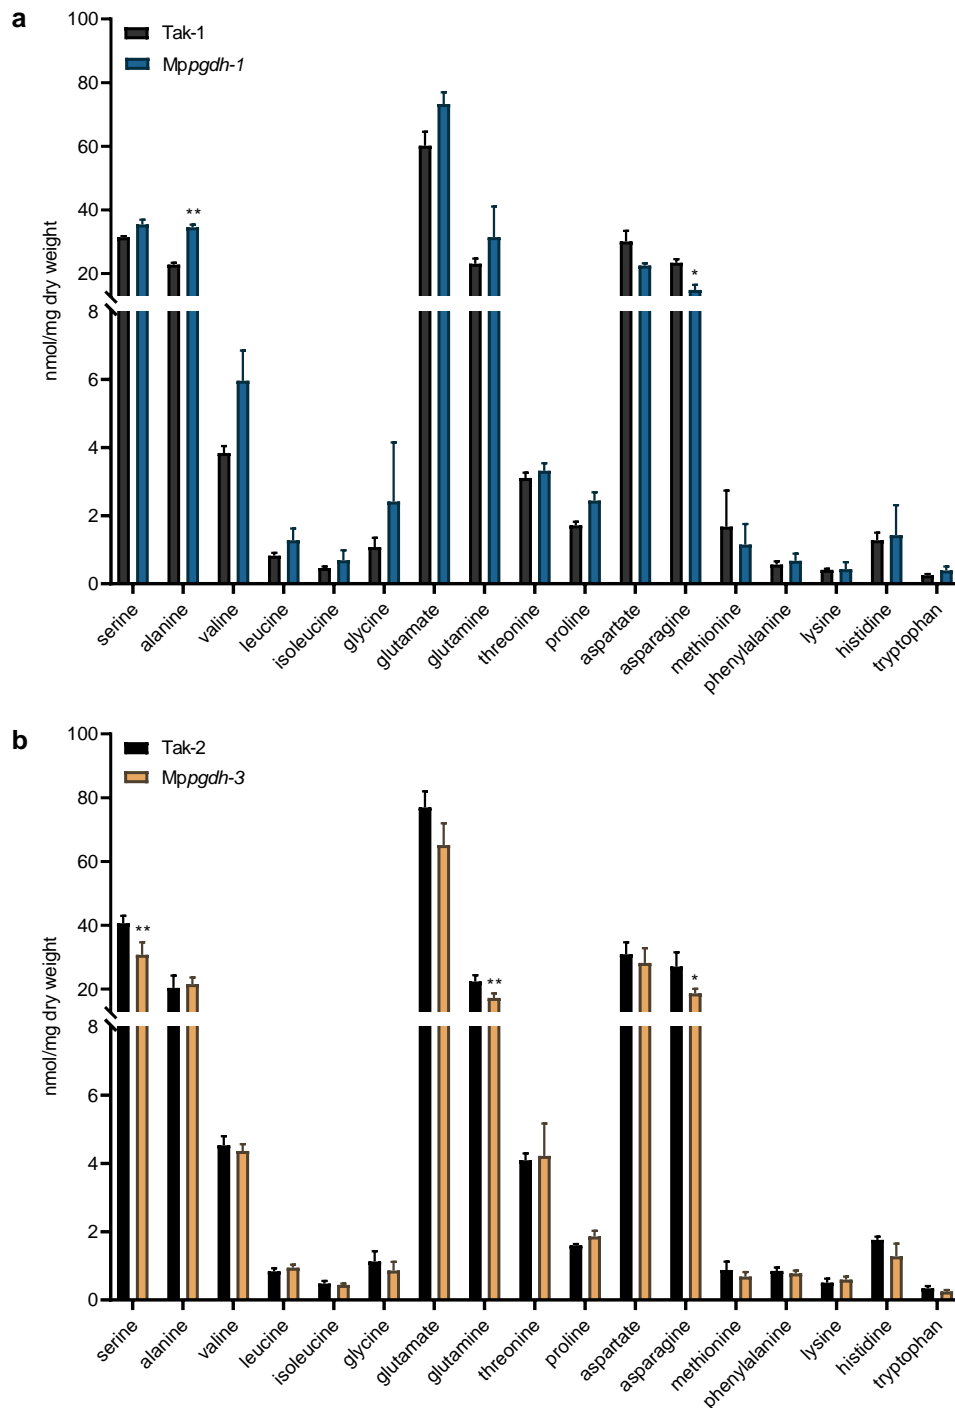

**Supplementary Fig. S6: Free amino acid contents in thalli of the *Mppgdh* mutants under L/D conditions.**

The thalli of male (**a**) and female (**b**) lines grown under L/D conditions were sampled during the light period and the free amino acid contents were measured using gas chromatography–quadrupole mass spectrometry. Data represent means  $\pm$  SD of three (a) or six (b) biological replicates. Asterisks indicate statistically significant differences (Student's *t*-test, \**p* < 0.05, \*\**p* < 0.01).

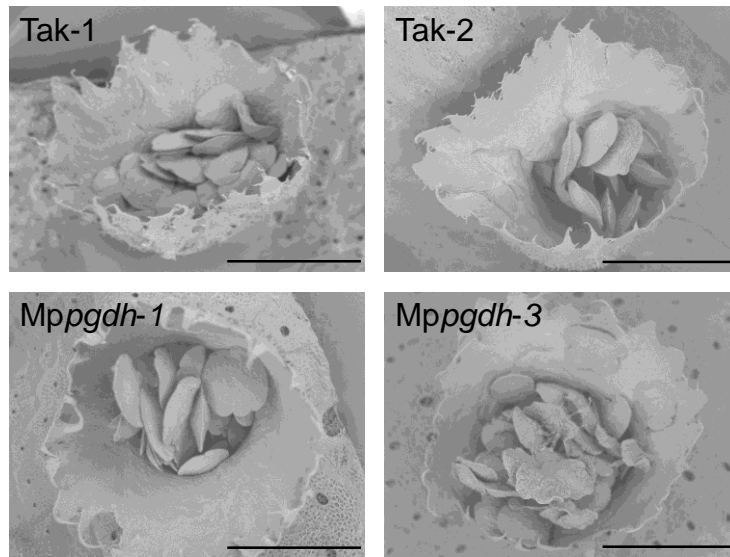

**Supplementary Fig. S7: Surface scanning electron microscope images of gemma cups.**

Plants were grown under L/D conditions for 14 days after germination. Top views of the gemma cups with gemmae inside were taken using a scanning electron microscope. Tak-1 and Tak-2 are the male and female wild type, respectively. Scale bars = 1 mm.

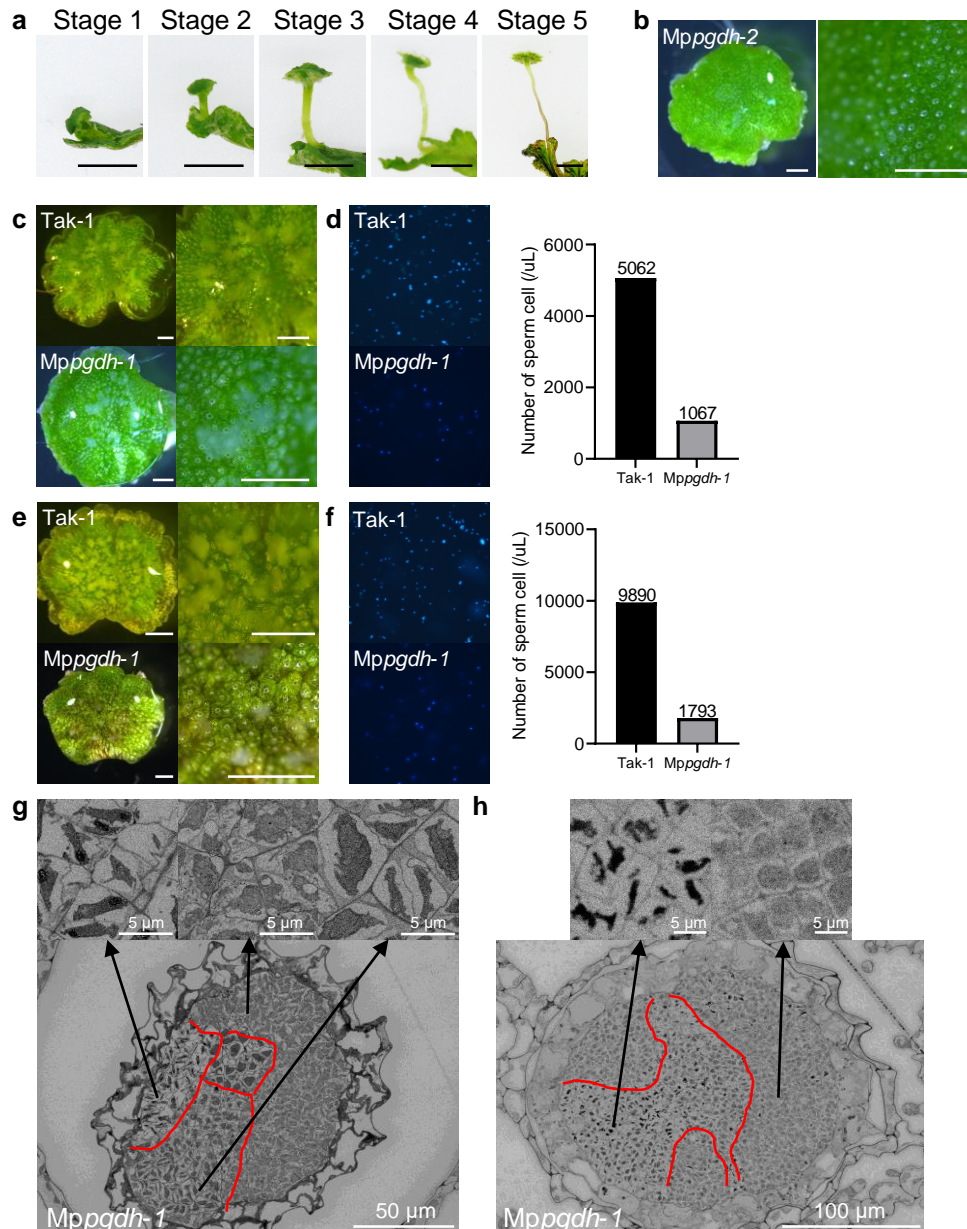

**Supplementary Fig. S8: Abnormal sperm differentiation in the male *Mppgdh* mutants.**

(a) Five stages of antheridiophore development in Tak-1. Scale bars = 1 cm. (b) Sterile phenotype of *Mppgdh-2*. No sperm clusters originated from the antheridial pores of *Mppgdh-2* grown under L/D conditions, after dropping water on the surface of the antheridiophores. Scale bars = 1mm. (c)–(f) Sperm formation under 16-h light/8-h dark (L/D) + serine (c, d) and continuous light (CL) (e, f) conditions. (c, e) The appearance of sperm clusters after dropping 50 μL water on the surface of antheridial receptacles. Scale bars = 1 mm. (d, f) Fluorescent staining of the sperm cells. The sperm cells in 10 μL water taken from (c) and (e) were visualized via Hoechst staining. The numbers of sperm in 1 μL water were counted (n = 1). (g), (h) FE-SEM images of antheridium and spermatogenous cells at different stages of cell division in *Mppgdh-1* under L/D + serine (g) and CL (h) conditions. The bottom panels show one antheridium. Red lines indicate the edges of different cell areas. The upper panels indicate enlarged images showing the shape of the cells in each area.



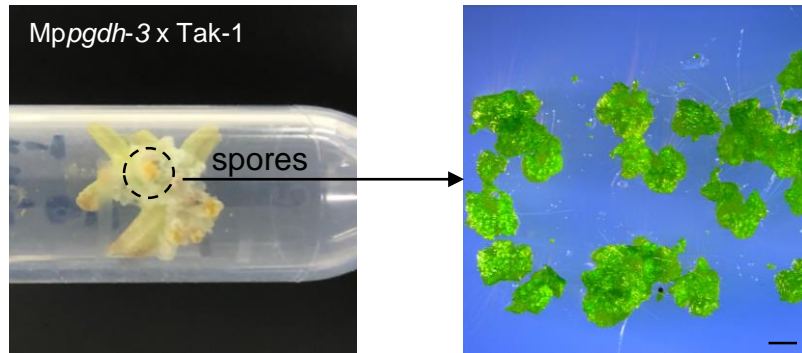

**Supplementary Fig. S9: Formation of viable spores in the *Mppgdh-3* x *Tak-1* cross under continuous light conditions.**

Scale bars = 1mm.

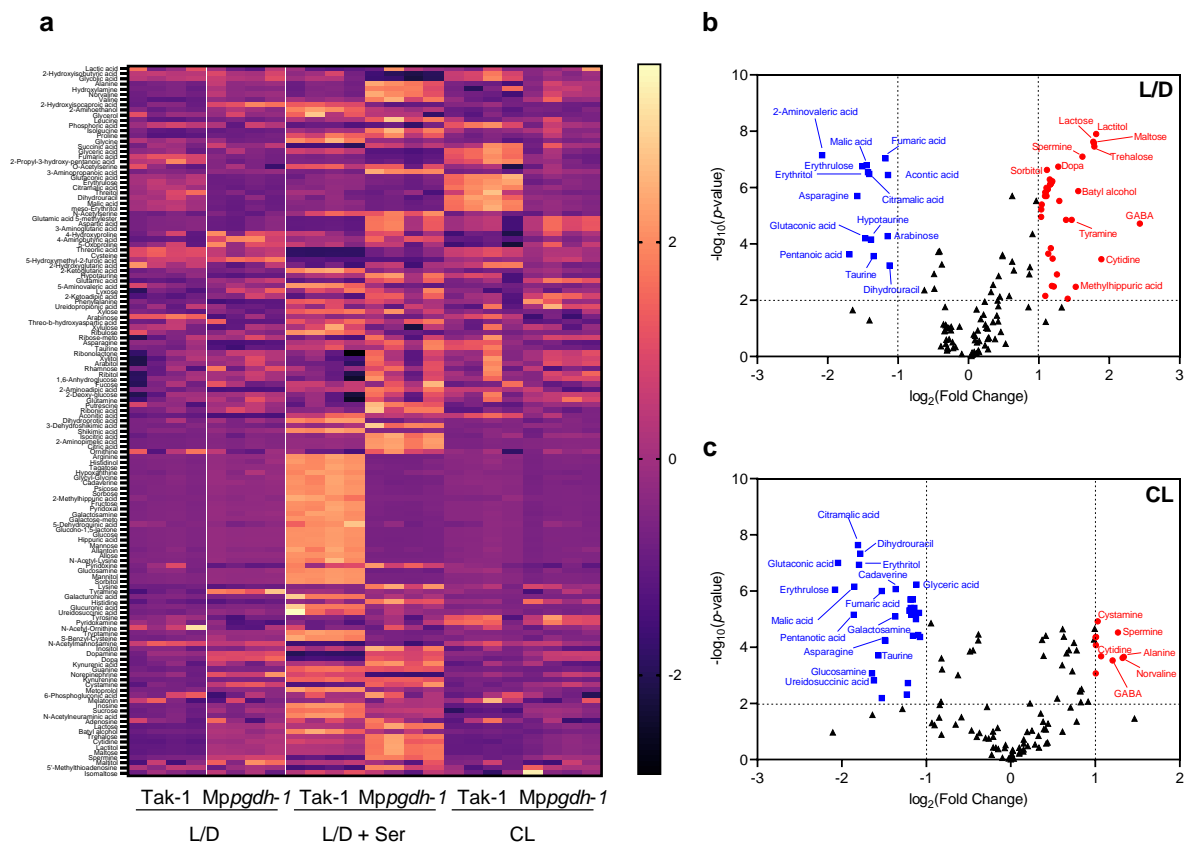

**Supplementary Fig. S10: Metabolome and differentially accumulated metabolites in 14-day-old thalli of *Mppgdh-1*.**

(a) Heatmap of all quality-filtered metabolites in Tak-1 and *Mppgdh-1* grown under 16 h light/8 h dark (L/D), L/D + serine, and continuous light (CL) conditions. The color bar on the right side of the heatmap indicates the Z-scores of the average content relative to those of the quality control samples ( $n = 4$ ). (b), (c) Volcano plot showing the differentially accumulated metabolites (DAMs) in *Mppgdh-1* under L/D (b) and CL (c) conditions. Red dots and blue squares represent significantly increased ( $p\text{-value} < 0.01$ , fold change  $> 2$ ) and decreased ( $p\text{-value} < 0.01$ , fold change  $< 0.5$ ) metabolites, respectively, in *Mppgdh-1*. Black triangles represent no significant differences between Tak-1 and *Mppgdh-1*.

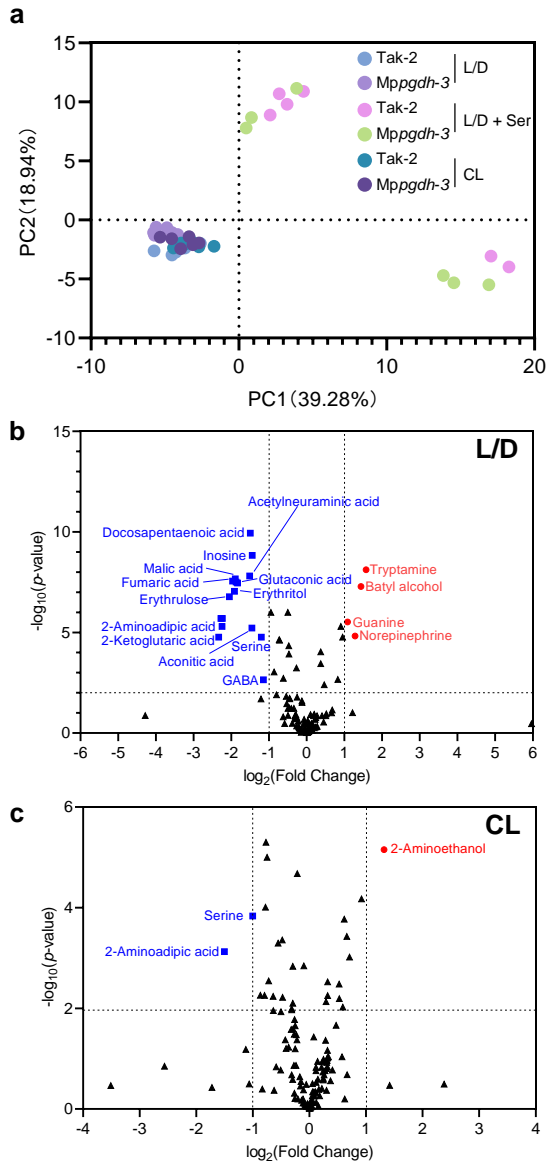

**Supplementary Fig. S11:**  
**Changes in metabolome in 14-day-old thalli of *Mppgdh-3*.**

(a) PCA score plot of Tak-2 and *Mppgdh-3* thallus samples grown under L/D, L/D + serine, and CL conditions ( $n = 6$ ). (b), (c) Volcano plot showing the DAMs in thalli of *Mppgdh-3* under L/D (b) and CL (c) conditions. Red dots and blue squares represent significantly increased ( $p\text{-value} < 0.01$ , fold change  $> 2$ ) and decreased ( $p\text{-value} < 0.01$ , fold change  $< 0.5$ ) metabolites, respectively, in *Mppgdh-3*. Black triangles represent no significant differences between Tak-2 and *Mppgdh-3*.

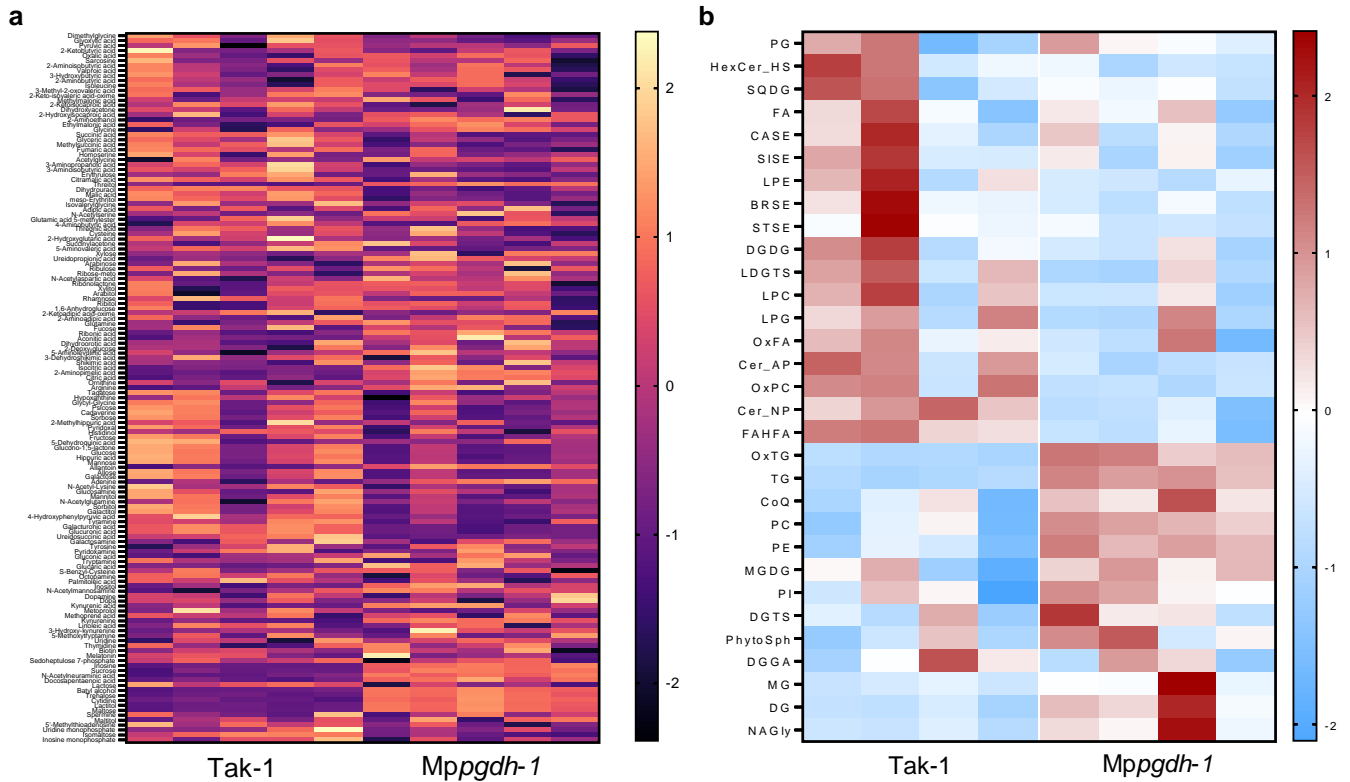

**Supplementary Fig. S12: Metabolome and lipidome in antheridial receptacle.**

(a), (b) Heatmap of all quality-filtered metabolites (a) and lipid classes (b) in antheridial receptacles of Tak-1 and Mppgdh-1 grown under 16-h light/8-h dark (L/D) conditions. The color bar on the right side of the heatmap indicates the Z-scores of the average content relative to those of the quality control samples.

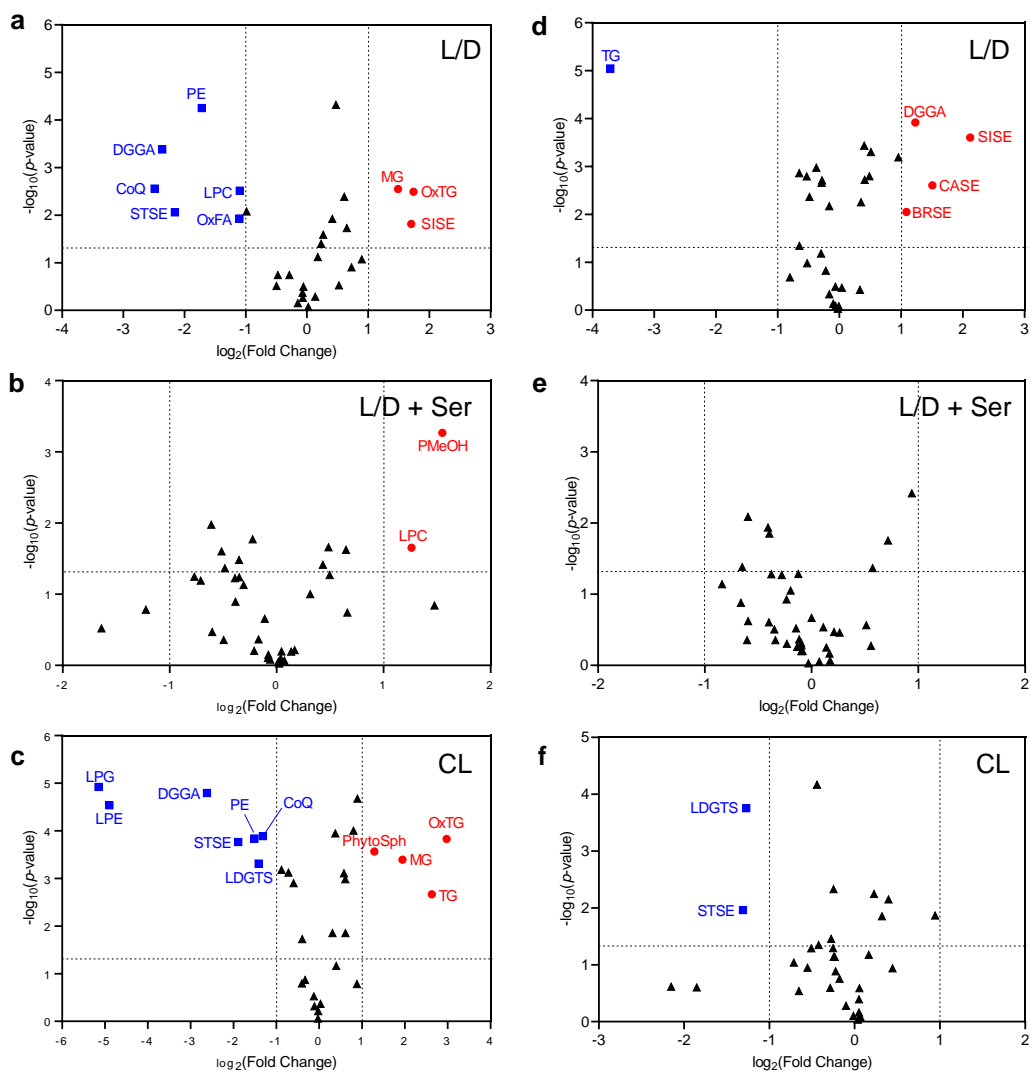

**Supplementary Fig. S13: Differentially accumulated lipid classes in 14-day-old thalli of *Mppgdh* mutants.**

(a)-(c) Volcano plot showing the differentially accumulated lipid classes in thalli of *Mppgdh-1* under L/D (a), L/D + serine (b), and CL (c) conditions. (d)-(f) Volcano plot showing the differentially accumulated lipid classes in thalli of *Mppgdh-3* under L/D (d), L/D + serine (e), and CL (f) conditions. Red dots and blue squares represent significantly increased ( $p$ -value < 0.05, fold change > 2) and decreased ( $p$ -value < 0.05, fold change < 0.5) lipid classes, respectively (n = 3). Black triangles represent no significant differences between mutants and wild types.

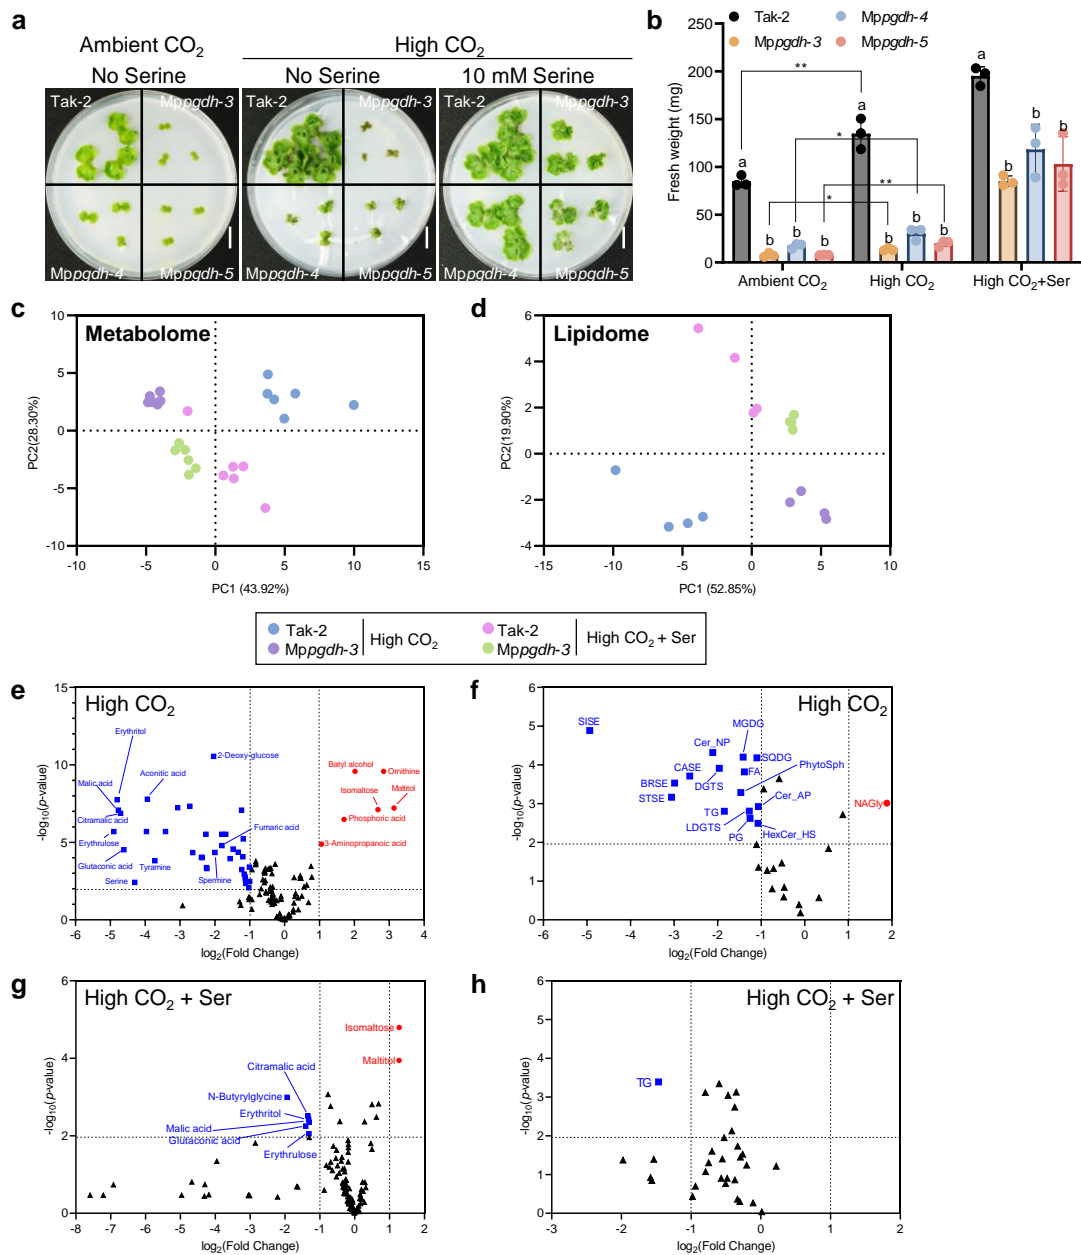

**Supplementary Fig. S14: Growth and metabolic phenotypes of female *Mppgdh* mutants under high CO<sub>2</sub> conditions.**

(a) Plants grown on ½ B5 agar medium for 14 days under L/D conditions in ambient CO<sub>2</sub> (400 ppm) or high CO<sub>2</sub> (3000 ppm) with or without serine supplementation. Scale bars = 1 cm. (b) The fresh weight of Tak-2 and *Mppgdh* mutants. Data are presented as means ± SD of three biological replicates (n = 3). One-way ANOVA followed by Tukey's test ( $p < 0.05$ ) was performed in each growth condition; columns with the same letter indicate no significant differences. Student's *t*-test was performed in each line grown under ambient CO<sub>2</sub> and high CO<sub>2</sub> conditions. Asterisks indicate statistically significant differences (Student's *t*-test, \* $p < 0.05$ , \*\* $p < 0.01$ ). (c), (d) PCA score plots of metabolome (c) (n = 6) and lipidome (d) (n = 4) data of Tak-2 and *Mppgdh-3* thalli grown under high CO<sub>2</sub> conditions with or without serine supplementation. (e)-(h) Volcano plot showing DAMs (e, g) and DALCs (f, h) in *Mppgdh-3* under the two growth conditions. Red dots and blue squares represent significantly increased ( $p$ -value  $< 0.01$ , fold change  $> 2$ ) and decreased ( $p$ -value  $< 0.01$ , fold change  $< 0.5$ ) metabolites/lipid classes, respectively, in *Mppgdh-3*. Black triangles represent no significant differences between Tak-2 and *Mppgdh-3*.

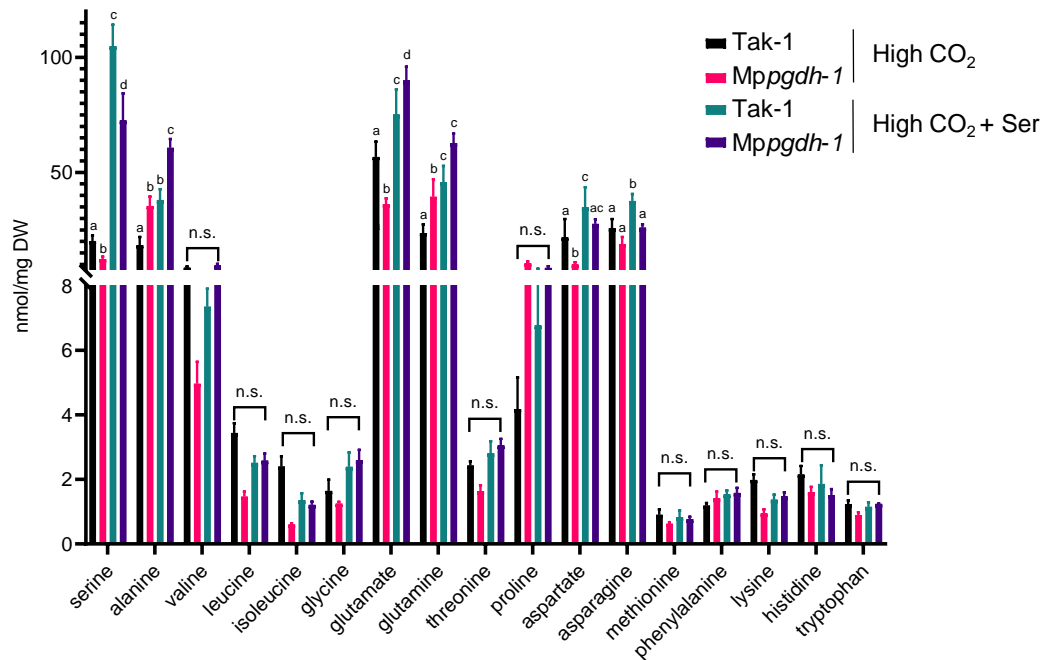

**Supplementary Fig. S15: Free amino acid contents in thalli under high CO<sub>2</sub> conditions.**

The thalli were grown under L/D conditions in high CO<sub>2</sub> with or without serine supplementation and the free amino acid contents were measured using gas chromatography–quadrupole mass spectrometry. Data represent means  $\pm$  SD of three biological replicates ( $n = 3$ ). Means with different letters are significantly different (Tukey's test following ANOVA,  $p < 0.05$ ; n.s., no significant difference).



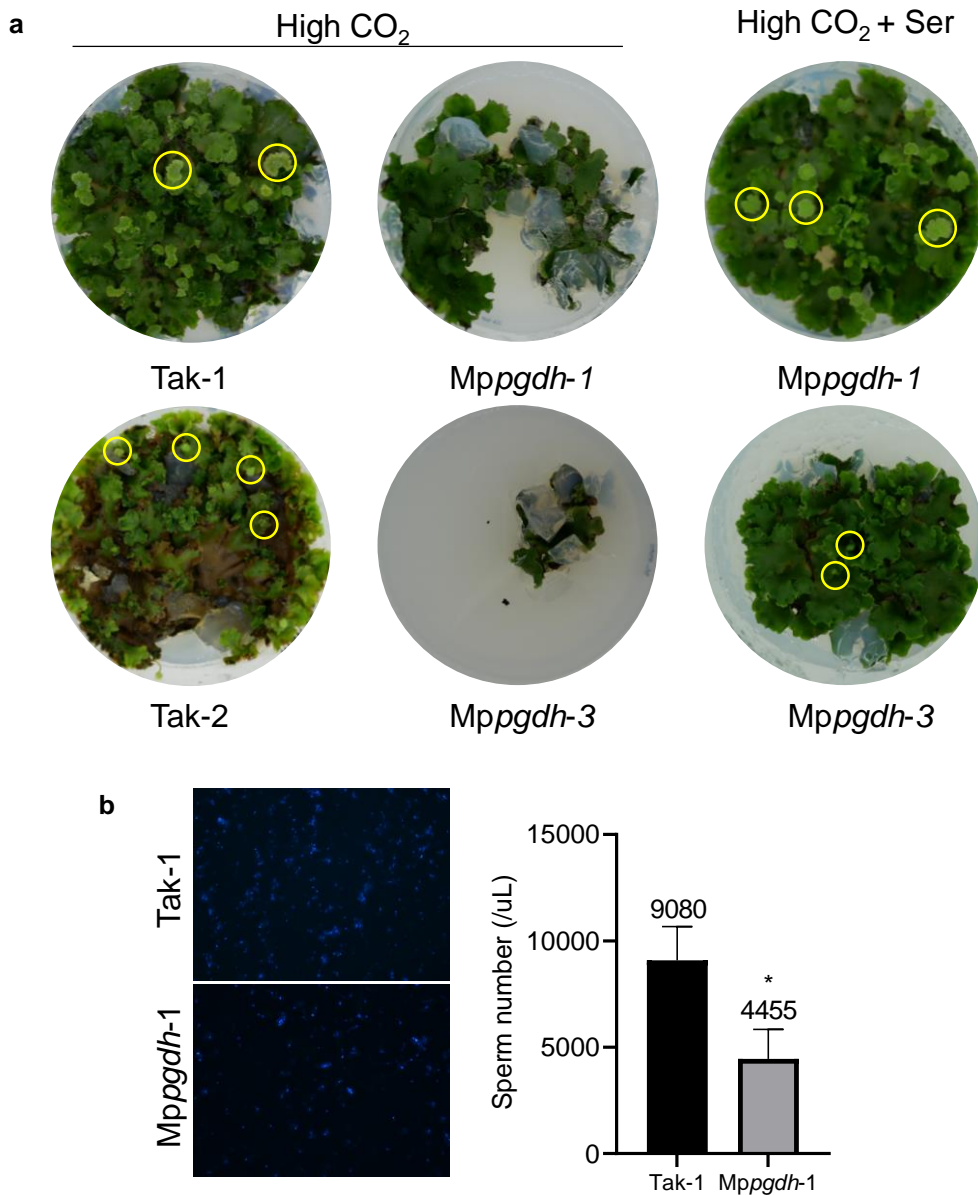

**Supplementary Fig. S16: Sexual reproduction of the mutants under high CO<sub>2</sub> conditions.**

(a) The development of sexual reproductive branches of plants grown in high CO<sub>2</sub> under L/D conditions for 2 months. The yellow circle indicates sexual reproductive branches. (b) Fluorescent staining of the sperm cells under high CO<sub>2</sub> conditions with serine supplement. The numbers of sperm cells in 1 μL water were counted (n = 4). Asterisk indicates statistically significant difference ( $p < 0.01$ ) by Student's  $t$ -test.

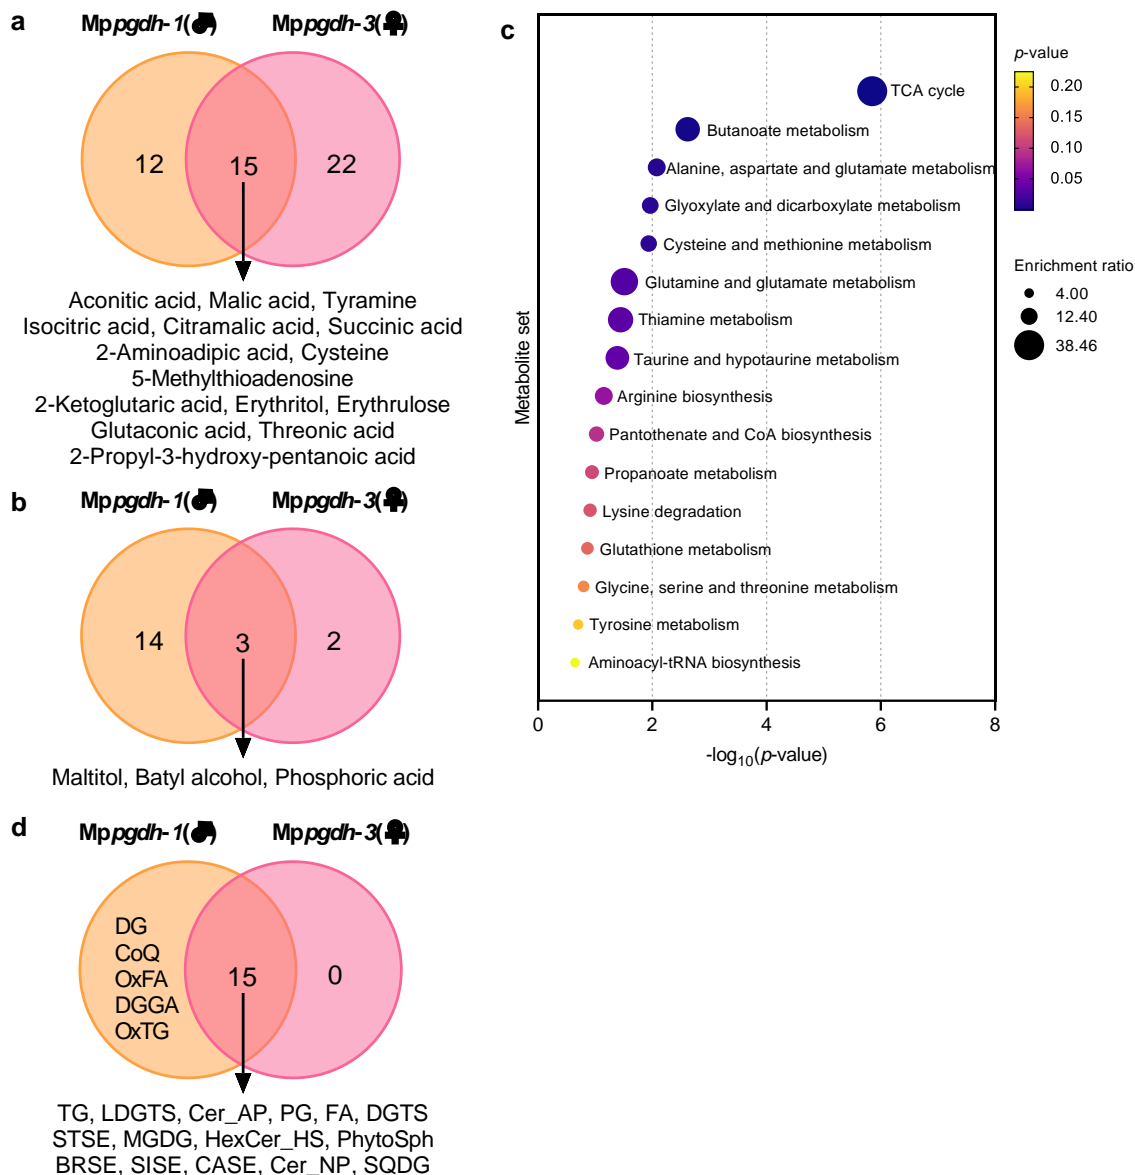

**Supplementary Fig. S17: Changes in metabolome and lipidome in 14-day-old thalli of the *Mppgdh* mutants grown under high CO<sub>2</sub> conditions.**

(a), (b) Venn diagrams showing the number of significantly decreased metabolites (a) and increased metabolites (b) in thalli of *Mppgdh-1* and *Mppgdh-3* under high CO<sub>2</sub> conditions. (c) KEGG pathway enrichment analysis of common DAMs shown in (a) and (b). Vertical and horizontal axes indicate the metabolite set and the value of  $-\log_{10}(p\text{-value})$ , respectively. The bubble size corresponds to the enrichment ratio. The color bar indicates the corrected  $p$ -value; yellow and navy blue represent higher and lower values, respectively. (d) Venn diagram showing the number of significantly decreased lipid classes in thalli of *Mppgdh-1* and *Mppgdh-3* under high CO<sub>2</sub> conditions. Abbreviations are defined in Supplemental Table S4.

**Supplementary Table S1. Primer pairs used for constructing MpPGDH mutants and proMpPGDH:GUS lines.**

| Purpose               | Primer name                  | Sequence (5'-3')                |
|-----------------------|------------------------------|---------------------------------|
| CRISPR/Cas9 line      | MpPGDH_gRNA_f1               | CTCGGCGCATCGTGCAAGACCGCG        |
|                       | MpPGDH_gRNA_r1               | AAACCGCGGTCTTGACGATGCGC         |
|                       | MpPGDH_gRNA_f2               | CTCGAGCGCACTTACCGGCCTTCA        |
|                       | MpPGDH_gRNA_r2               | AAACTGAAGGCCCGTAAGTGCGCT        |
| proMpPGDH:GUS line    | MpPGDH <sub>pro</sub> _5kb_F | CACAAAATGTCATATAAAAGGAGTAAAAATG |
|                       | MpPGDH <sub>pro</sub> _5kb_R | CATGACCGCGTCTGCCATTTCTCTCCGGGC  |
|                       | pMpGWB104_r3021              | CCCAATCCAGTCCATTAATGCGTGGTCGTG  |
|                       | pMpGWB104_r4111              | AATGTATAATTGCGGGACTCTAATCATAAA  |
| Male line selection   | rbm27-F                      | ACTTTTGCAACAGCGACTTC            |
|                       | rbm27-R                      | GCCTGCAATATAGCCTTCAA            |
| Female line selection | rhf73-F                      | GAACCCGAAACTCAGGTTTT            |
|                       | rhf73-R                      | ATAACAGCCAAACGGATCAA            |

**Supplementary Table S2. Primer pairs used for qRT-PCR**

| Gene              | Forward (5'-3')              | Reverse (5'-3')           |
|-------------------|------------------------------|---------------------------|
| Mp <i>ACT1</i>    | CAGTGTCTGGATCGGAGGAT         | CACCACTCAAAGTGAAGCA       |
| Mp <i>PGDH</i>    | CGCAGGAAGGAGTTGCAGTAG        | TCTCTCGGCCAAAGTGACATAG    |
| Mp <i>PSAT</i>    | TCTGTCCCCGTGTGTAATGC         | GTGCATCGGGTGACAAGAGA      |
| Mp <i>PSP</i>     | TTGATGCTACCGAACCCACC         | ACGGACTGCTACTCCTCCAT      |
| Mp <i>SHMT</i>    | AAGTACTCCGAGGGTCTCCC         | CATTTGCGAGGATCGCAGTG      |
| Mp <i>GDH</i>     | AATGGCGACATTAGCTGCCT         | GAGTCCCAAGACTTTGCGCT      |
| Mp <i>DUO1</i>    | CTCTTAGTTTGAAGAAGCAGCGGAG    | CACCACTCTTGAGATCCGGCTTG   |
| Mp <i>DAZ1</i>    | TGTTTTATCACCCGCCTAGC         | AGGCGAACAAAACATTGGAC      |
| Mp <i>MID</i>     | CACATCATCTGAAGCTGTCAGATCTATC | CTAAACTTCGAACCTTGCGTCCTGG |
| Mp <i>RKD</i>     | TCGAGCTTTGGCAATGCATA         | TTGCGGATTCTCTCGTGACAC     |
| Mp <i>PRM</i>     | ATCCAGCGGCGTGAGCCAGA         | CGAAGAATGCGGAAGACTGA      |
| Mp <i>TUA5</i>    | GTGCAGATCGACGACAAAGGATC      | GAGAATTCTCCGAAGCTCGTGAG   |
| Mp <i>LC7</i>     | CGTCGACAATGACGGAAATA         | TACTGTTGTGCGACCAGGAG      |
| Mp <i>CEN1</i>    | CCAAAATGGGTGAACGAGAT         | ACCATCTCGATCTGCTTCGT      |
| Mp <i>HMGBOX1</i> | TACGGGGAAGGCGAAGAAAG         | GGCTTGGCGTCTTTGACAAC      |
| Mp <i>HMGBOX2</i> | AGAGCAGAAGAAGCTCGCTG         | TGACGGGAACCTCAATGGTG      |
| Mp <i>HMGBOX3</i> | AGCAGGCTCAGATGACGAAG         | GTCATCCGTTGGTGACCCTT      |
| Mp <i>HMGBOX4</i> | CGAGCAACAAATCGACGAGG         | GCCGAAAGTCATAGTCGGGT      |
| Mp <i>HMGBOX5</i> | TGGTCACTGTAAGGGTGGA          | ACAATGCCGTCGTTCTTCT       |
| Mp <i>TOP1</i>    | CGAAGAAGAGACCCGCAGTT         | AAGAACCCGATTTGGGCGAT      |
| Mp <i>TOP2</i>    | CACCTACAAAGCGGGTCACT         | CTCCGCCTCAAAGTCGGAAT      |
| Mp <i>TOP3α</i>   | TCAACCGCCACGGTTATTCA         | TGCGGAAGTTTCGAGAGCAT      |
| Mp <i>TOP3β</i>   | CCTTTGACCTCTTCGACGCT         | TAATCGCAGGAGCGACCTTC      |
| Mp <i>ATG5</i>    | CCGGGAGATTACCAATGCGT         | GGAACGTCGATCGGTCTTGT      |
| Mp <i>ATG7</i>    | ATGGAGCCGTCAATGCAAGA         | AGTTACGGAGAGGCCATCCT      |
| Mp <i>ATG13</i>   | TTCTCTTCCGTCTTCGGTGC         | GCTGGGGGTAAGTGCATCTT      |

**Supplementary Table S4. List of lipid abbreviations**

| Categories           | Abbreviations | Definition                                                                                                |
|----------------------|---------------|-----------------------------------------------------------------------------------------------------------|
| Sterol Lipids        | BRSE          | Brassicasterol ester                                                                                      |
|                      | CASE          | Campesterol ester                                                                                         |
|                      | SISE          | Sitosterol ester                                                                                          |
|                      | STSE          | Stigmasterol ester                                                                                        |
| Sphingolipids        | PhytoSph      | Phytosphingosine                                                                                          |
|                      | Cer_AP        | Ceramide alpha-hydroxy fatty acid-phytosphingosine                                                        |
|                      | Cer_NP        | Ceramide non-hydroxyfatty acid-phytosphingosine                                                           |
|                      | HexCer_HS     | Hexosylceramide hydroxyfatty acid-sphingosine                                                             |
| Glycerolipids        | DG            | Diacylglycerol                                                                                            |
|                      | DGDG          | Digalactosyldiacylglycerol                                                                                |
|                      | MGDG          | Monogalactosyldiacylglycerol                                                                              |
|                      | SQDG          | Sulfoquinovosyl diacylglycerol                                                                            |
|                      | DGGA          | Diacylglyceryl glucuronide                                                                                |
|                      | DGTS          | Diacylglyceryl trimethylhomoserine/diacylglyceryl hydroxymethyl-N,N,N-trimethyl- $\beta$ -alanine         |
|                      | LDGTS         | Lysodiacylglyceryl trimethylhomoserine/Lysodiacylglyceryl hydroxymethyl-N,N,N-trimethyl- $\beta$ -alanine |
|                      | MG            | Monoacylglycerol                                                                                          |
|                      | TG            | Triacylglycerol                                                                                           |
|                      | OxTG          | Oxidized triglyceride                                                                                     |
| Glycerophospholipids | PC            | Phosphatidylcholine                                                                                       |
|                      | OxPC          | Oxidized phosphatidylcholine                                                                              |
|                      | LPC           | Lysophosphatidylcholine                                                                                   |
|                      | PG            | Phosphatidylglycerol                                                                                      |
|                      | LPG           | Lysophosphatidylglycerol                                                                                  |
|                      | PE            | Phosphatidylethanolamine                                                                                  |
|                      | LPE           | Lysophosphatidylethanolamine                                                                              |
|                      | PI            | Phosphatidylinositol                                                                                      |
| Fatty acyls          | FA            | Free fatty acid                                                                                           |
|                      | OxFA          | Oxidized fatty acid                                                                                       |
|                      | NAGly         | N-acyl glycine                                                                                            |
|                      | FAHFA         | Fatty acid ester of hydroxyl fatty acid                                                                   |
| Prenol Lipids        | CoQ           | Coenzyme Q                                                                                                |
