# Supplementary material for: Functions of serine from the phosphorylated pathway on growth, male gametogenesis, and metabolism in Marchantia polymorpha
Source: Research Square preprint supplement (doi:10.21203/rs.3.rs-2663856/v1), 2023-04-10
Supplement: Supplementary file 1 [file 58fb2f59b76a570caf1703f6.xlsx]

## Sheet: DAMs
Supplementary Table S3: Differentially accumulated metabolites and lipid classes in Mppgdh mutants
Part	Thallus				Thallus				Thallus				Thallus				Thallus				Antheridiophore
Growth condition	16 h light/8 h dark				16 h light/8 h dark + 10 mM Serine				Continuous light				16 h light/8 h dark + high CO2				16 h light/8 h dark + high CO2 + 10 Mm Serine				16 h light/8 h dark
Mutant	male Mppgdh-1		female Mppgdh-3		male Mppgdh-1		female Mppgdh-3		male Mppgdh-1		female Mppgdh-3		male Mppgdh-1		female Mppgdh-3		male Mppgdh-1		female Mppgdh-3		male Mppgdh-1
	decreased	increased	decreased	increased	decreased	increased	decreased	increased	decreased	increased	decreased	increased	decreased	increased	decreased	increased	decreased	increased	decreased	increased	decreased	increased
	2-Aminoadipic acid	Lactitol	Docosapentaenoic acid	Tryptamine	2-Hydroxyisobutyric acid	Alanine	Ureidosuccinic acid		Glyceric acid	Alanine	Serine	2-Aminoethanol	Isoleucine	Phosphoric acid	Serine	Phosphoric acid	Arabinose		Glutaconic acid	Maltitol	Dihydrouracil	Ureidopropionic acid
	Fumaric acid	Lactose	Inosine	Batyl alcohol	Glycolic acid	Hydroxylamine			Fumaric acid	Norvaline	2-Aminoadipic acid		Succinic acid	Proline	Succinic acid	3-Aminopropanoic acid			N-Butyrylglycine	Isomaltose	5-Aminovaleric acid	Batyl alcohol
	Malic acid	Maltose	N-Acetylneuraminic acid	Guanine	2-Hydroxyisocaproic acid	Norvaline			2-Propyl-3-hydroxy-pentanoic acid	4-Aminobutyric acid			2-Propyl-3-hydroxy-pentanoic acid	4-Aminobutyric acid	Catechol	Batyl alcohol			Erythrulose		Glucuronic acid	Trehalose
	Erythrulose	Trehalose	Malic acid	Norepinephrine	Glycine	Isoleucine			Glutaconic acid	Dopa			Glutaconic acid	Lyxose	Fumaric acid	Maltitol			Citramalic acid		Ureidosuccinic acid	Cytidine
	Erythritol	Spermine	Fumaric acid		Glyceric acid	3-Aminopropanoic acid			Erythrulose	Cystamine			Erythrulose	Ureidopropionic acid	2-Propyl-3-hydroxy-pentanoic acid	Isomaltose			Malic acid			Lactitol
	Citramalic acid	Dopa	Glutaconic acid		2-Propyl-3-hydroxy-pentanoic acid	Glutamic acid			Citramalic acid	Lactose			Citramalic acid	Galacturonic acid	Glutaconic acid	Ornithine			Erythritol			Maltose
	Aconitic acid	Sorbitol	Citramalic acid		2-Ketoglutaric acid	5-Methylester			Dihydrouracil	Cytidine			Dihydrouracil	Glucuronic acid	3-Aminoisobutyric acid
	Asparagine	Hippuric acid	Erythritol		5-Aminovaleric acid	Aspartic acid			Malic acid	Maltose			Malic acid	Ureidosuccinic acid	Erythrulose
	Arabinose	Galactose	Erythrulose		Ribulose	3-Aminoglutaric acid			Erythritol	Spermine			Erythritol	Metoprolol	Citramalic acid
	Glutaconic acid	Glucono-1,5-lactone	3-Aminoisobutyric acid		Dihydroorotic acid	Threonic acid			Asparagine	5'-Methylthioadenosine			Glutamic acid	Adenosine	Malic acid
	Hypotaurine	Mannose	2-Propyl-3-hydroxy-pentanoic acid		Shikimic acid	Cysteine			Taurine				5-Methylester	Lactose	Erythritol
	2-Propyl-3-hydroxy-pentanoic acid	Glucose	2-Aminoadipic acid		Arginine	3-Dehydroshikimic acid			2-Aminoadipic acid				Aspartic acid	Batyl alcohol	Threonic acid
	Taurine	Allose	Aconitic acid		Histidinol	Isocitric acid			Aconitic acid				3-Aminoglutaric acid	Trehalose	Cysteine
	Dihydrouracil	Mannitol	2-Ketoglutaric acid		Tagatose	2-Aminopimelic acid			Arginine				Threonic acid	Lactitol	2-Ketoglutaric acid
		Tagatose	Serine		Hypoxanthine	Citric acid			Histidinol				Cysteine	Maltose	3-Aminoglutaric acid
		Batyl alcohol	4-Aminobutyric acid		Glycyl-Glycine	Lysine			Tagatose				2-Ketoglutaric acid	Maltitol	Glutamic acid
		Fructose			Cadaverine	Histidine			Hypoxanthine				Xylose	Isomaltose	Xylose
		Sorbose			Psicose	Dopamine			Glycyl-Glycine				Arabinose		2-Ketoadipic acid
		Pyridoxal			Sorbose	Dopa			Cadaverine				2-Aminoadipic acid		2-Aminoadipic acid
		Psicose			2-Methylhippuric acid	Cystamine			Psicose				Aconitic acid		Aconitic acid
		2-Hydroxyisocaproic acid			Fructose	Lactose			Sorbose				3-Dehydroshikimic acid		Dihydroorotic acid
		Cadaverine			Pyridoxal	Trehalose			Fructose				Isocitric acid		2-Deoxy-glucose
		Arginine			Galactosamine	Lactitol			Pyridoxal				Tyramine		Shikimic acid
		Galactosamine			Galactose	Spermine			Galactosamine				Histidine		Isocitric acid
		Tyramine			5-Dehydroquinic acid	5'-Methylthioadenosine			Galactose				N-Acetylmannosamine		Tyramine
		Cystamine			Glucono-1,5-lactone				Glucono-1,5-lactone				Guanine		Dopamine
		4-Aminobutyric acid			Glucose				Glucose				Kynurenine		N-Acetylmannosamine
		Guanine			Hippuric acid				Hippuric acid				5'-Methylthioadenosine		Dopa
		Norepinephrine			Mannose				Mannose						Pyridoxamine
		Tryptamine			Allantoin				Allose						Cystamine
		Cytidine			Allose				Pyridoxine						Metoprolol
		Histidinol			N-Acetyl-Lysine				Glucosamine						3-Hydroxy-kynurenine
		N-Acetyl-Lysine			Glucosamine				Mannitol						Inosine
		Allantoin			Mannitol				Sorbitol						N-Acetylneuraminic acid
		2-Methylhippuric acid			Sorbitol				Ureidosuccinic acid						Docosapentaenoic acid
		Metoprolol			Galacturonic acid										Spermine
		Hypoxanthine			Glucuronic acid										5'-Methylthioadenosine
					Tryptamine
					S-Benzyl-Cysteine
					Norepinephrine
					Metoprolol
					Batyl alcohol

## Sheet: DALCs
Supplementary Table S3: Differentially accumulated metabolites and lipid classes in Mppgdh mutants
Part	Thallus				Thallus				Thallus				Thallus				Thallus				Antheridiophore
Growth condition	16 h light/8 h dark				16 h light/8 h dark + 10 mM Serine				Continuous light				16 h light/8 h dark + high CO2				16 h light/8 h dark + high CO2 + 10 Mm Serine				16 h light/8 h dark
Mutant	male Mppgdh-1		female Mppgdh-3		male Mppgdh-1		female Mppgdh-3		male Mppgdh-1		female Mppgdh-3		male Mppgdh-1		female Mppgdh-3		male Mppgdh-1		female Mppgdh-3		male Mppgdh-1
	decreased	increased	decreased	increased	decreased	increased	decreased	increased	decreased	increased	decreased	increased	decreased	increased	decreased	increased	decreased	increased	decreased	increased	decreased	increased
	CoQ	MG	TG	DGGA		LPG			CoQ	MG	LDGTS		BRSE	MG	SISE	NAGly			TG		OxPC	TG
	DGGA	OxTG		SISE		TG			DGGA	OxTG	STSE		CASE		SQDG							OxTG
	LPC	SISE		CASE		LPC			LDGTS	PhytoSph			Cer_AP		STSE							PE
	OxFA			BRSE					LPE	TG			Cer_NP		TG
	PE								LPG				CoQ		PG
	STSE								PE				DG		MGDG
									STSE				DGGA		PhytoSph
													DGTS		HexCer_HS
													FA		LDGTS
													HexCer_HS		DGTS
													LDGTS		FA
													MGDG		BRSE
													OxFA		CASE
													OxTG		Cer_AP
													PG		Cer_NP
													PhytoSph
													SISE
													SQDG
													STSE
													TG
